# Supplementary material for: Effects of Light Intensity Activity on CVD Risk Factors: A Systematic Review of Intervention Studies
Source: Hindawi journal article supplement (doi:10.1155/2015/596367), 2015-01-01
Supplement: f1 [file 596367.f1.pdf]

Table 1. Review search criteria.

---

|                          |                                                                                                                                                                                                                                                                                                                                                                                                                                                                                                                                                                                                                                                                                                                                                                                                                                                                                                                                                                                                                                                                                                                                                                                                                                                                                            |
|--------------------------|--------------------------------------------------------------------------------------------------------------------------------------------------------------------------------------------------------------------------------------------------------------------------------------------------------------------------------------------------------------------------------------------------------------------------------------------------------------------------------------------------------------------------------------------------------------------------------------------------------------------------------------------------------------------------------------------------------------------------------------------------------------------------------------------------------------------------------------------------------------------------------------------------------------------------------------------------------------------------------------------------------------------------------------------------------------------------------------------------------------------------------------------------------------------------------------------------------------------------------------------------------------------------------------------|
| <b>Search terms</b>      | (light-intensity training OR low-intensity training OR light-intensity exercise OR low-intensity exercise OR light-intensity activity OR low-intensity activity OR light-intensity physical activity OR low-intensity physical activity OR light-intensity walking OR light-intensity lifestyle OR light intensity training OR low intensity training OR mild intensity training OR light intensity exercise OR low intensity exercise OR mild intensity exercise OR light intensity activity OR low intensity activity OR mild intensity activity OR light intensity physical activity OR low intensity physical activity OR light intensity walking OR mild intensity walking OR light intensity lifestyle OR LIPA) AND (fasting plasma glucose OR glycosylated hemoglobin OR HbA1c OR triglycerides OR insulin OR total cholesterol OR LDL cholesterol OR HDL cholesterol OR CRP OR C-reactive protein OR IL-6 OR interleukin-6 OR TNF-alpha OR TNF receptor-1 OR TNFR1 OR TNF receptor-2 OR TNFR2 OR "body mass index" OR BMI OR waist circumference OR hip circumference OR waist-to-hip ratio OR resting heart rate OR percent body fat OR lean body mass OR resting blood pressure OR maximum heart rate OR VO <sub>2</sub> max) AND Humans[MeSH] AND Adult[MeSH] AND English[lang] |
| <b>Publication types</b> | clinical trials, randomized controlled trials, controlled clinical trials, and comparative studies                                                                                                                                                                                                                                                                                                                                                                                                                                                                                                                                                                                                                                                                                                                                                                                                                                                                                                                                                                                                                                                                                                                                                                                         |

---

Table 2. Detailed description of included studies.

| Study                      | Duration of Intervention | Study Design | Baseline Activity Level <sup>a</sup>                                       | Activity Level Intensity (used criteria) | Modality                                                        | Duration and Frequency | Method of activity measurement | Compliance                          | Mean change in activity |
|----------------------------|--------------------------|--------------|----------------------------------------------------------------------------|------------------------------------------|-----------------------------------------------------------------|------------------------|--------------------------------|-------------------------------------|-------------------------|
| Stevenson & Topp 1990 [56] | 9 mo                     | RCT          | No data                                                                    | 30-40% HRR                               | Stretching and calisthenics, stationary cycling, slow walking   | 30 min 3x/wk           | HR monitor                     | No data                             | No data                 |
| Keller & Trevino 2001 [26] | 24 wk                    | RCT          | Sedentary (exercising <30min/wk)                                           | 50% target HR                            | Walking at 50% of target HR                                     | 30 min 3x/wk           | Pedometer                      | 88%                                 | No data                 |
| Krause et al. 2014 [30]    | 16 wk                    | RCT          | Sedentary (not engaged in any regular physical activity for the last 6 mo) | 30-40% VO <sub>2</sub> max               | Outdoor walking                                                 | 30 min 3x/week         | HR monitor                     | 92% (44 ± 7 of 48 walking sessions) | No data                 |
| Cox et al. 2004 [28]       | 16 wk                    | RCT          | Sedentary (<2 30-min sessions of vigorous exercise/wk)                     | 17-24% HRR (slow flexibility exercises)  | Stationary cycling, slow flexibility exercises and slow walking | 30 min 3x/wk           | Ergometer                      | No data                             | No data                 |
| Cox et al. 2003 [27]       | 16 wk                    | RCT          | Sedentary (<2 30-min sessions of vigorous exercise/wk)                     | 17-24% HRR (slow flexibility exercises)  | Stationary cycling, slow flexibility exercises and slow walking | 30 min 3x/wk           | Ergometer                      | 100%                                | No data                 |
| Cox et al. 1996 [29]       | 16 wk                    | RCT          | Sedentary (<2 30-min sessions of vigorous exercise/wk)                     | 17-24% HRR (slow flexibility exercises)  | Stationary cycling, slow flexibility exercises and slow walking | 30 min 3x/wk           | Ergometer                      | 100%                                | No data                 |

Table 2 (continued)

| Study                         | Duration of Intervention | Study Design       | Baseline Activity Level <sup>a</sup>             | Activity Level Intensity (used criteria) | Modality                                                 | Duration and Frequency                                                   | Method of activity measurement | Compliance | Mean change in activity |
|-------------------------------|--------------------------|--------------------|--------------------------------------------------|------------------------------------------|----------------------------------------------------------|--------------------------------------------------------------------------|--------------------------------|------------|-------------------------|
| Goldie et al. 2013[31]        | 12 wk                    | RCT                | Sedentary (fewer than 3x/wk of aerobic exercise) | < 40% HRR                                | Home walking                                             | 0.8km/d for 2 wk increased every wk (400m/d) to a max of 4.8km/d 3-5x/wk | Self-reported                  | 81%        | No data                 |
| Goto et al. 2003 [53]         | 12 wk                    | NRCT               | No exercise habit <sup>b</sup>                   | 25% VO <sub>2</sub> max                  | Stationary cycling                                       | 30 min 5x-7x/wk                                                          | Ergometer                      | 100%       | No data                 |
| Skoro-Kondza et al. 2009 [41] | 12 wk                    | RCT                | No data                                          | 2.5 METs                                 | Yoga                                                     | 90 min 2x/wk                                                             | No data                        | No data    | No data                 |
| Cornelissen et al. 2009 [32]  | 10 wk                    | RCD                | Sedentary (≤30min of heavy exercise/wk)          | 33% HRR                                  | Treadmill walking, stationary cycling, stepping          | 60 min 3x/wk                                                             | HR monitor                     | 90.8%      | No data                 |
| Gordon et al. 1996 [42]       | 8 wk                     | RCT                | Habitually active <sup>b</sup>                   | 35% VO <sub>2</sub> max                  | Stationary cycling                                       | 15 min 3x/wk                                                             | Ergometer                      | 100%       | No data                 |
| Van Den Berg et al. 2010 [55] | 7 wk                     | RCT                | Untrained <sup>b</sup>                           | 30% HRR                                  | Hand rim wheelchair training on a motor-driven treadmill | 30 min 3x/wk                                                             | HR monitor                     | 100%       | No data                 |
| Davenport et al. 2008 [33]    | 6 wk                     | Case Control Study | No data                                          | 30% HRR                                  | Walking at 30% HRR                                       | 40 min 3-4x/wk                                                           | HR monitor                     | No data    | No data                 |
| Allgayer et al. 2004 [34]     | 2 wk                     | RCT                | No data                                          | 30-40% VO <sub>2</sub> max               | Stationary cycling                                       | 40 min/d                                                                 | Ergometer                      | No data    | No data                 |

Table 2 (continued)

| Study                     | Duration of Intervention | Study Design | Baseline Activity Level <sup>a</sup> | Activity Level Intensity (used criteria)                                     | Modality                                                      | Duration and Frequency              | Method of activity measurement | Compliance | Mean change in activity                                                                                                                                                       |
|---------------------------|--------------------------|--------------|--------------------------------------|------------------------------------------------------------------------------|---------------------------------------------------------------|-------------------------------------|--------------------------------|------------|-------------------------------------------------------------------------------------------------------------------------------------------------------------------------------|
| Thorp et al. 2014 [35]    | 5 d                      | RCD          | Sedentary (desk-bound occupation)    | < 3 METs (Interchanging seated and standing posture every 30 min for 8hrs/d) | Standing in position with light ambulatory movement permitted | 30 min standing every 30 min 8x/day | Activity monitor               | 97-98%     | Sitting group (min/d):<br>468.1 ± 1.3 sitting; 3.2 ± 0.4 stepping; 7.9 ± 0.8 standing<br>LIPA group (min/d):<br>232.0 ± 1.4 sitting; 5.6 ± 0.4 stepping; 242.5 ± 1.5 standing |
| Duvivier et al. 2013 [57] | 4 d                      | RCD          | Physical exercise less than 1hr/wk   | < 3 METs                                                                     | Leisure walking (4 hr) and standing (2 hr)                    | 4 hr walking and 2 hr standing/d    | Activity monitor               | 100%       | Sitting group: 13.6 ± 1.2 hr/d sitting; 0.99 ± 0.5 hr/d standing; 4324 ± 1485 steps/d<br>LIPA group: 7.4 ± 1.3 hr/d sitting; 3.08 ± 0.88 hr/d standing; 27590 ± 3724 steps/d  |

Table 2 (continued)

| Study                             | Duration of Intervention | Study Design | Baseline Activity Level <sup>a</sup>                   | Activity Level Intensity (used criteria) | Modality           | Duration and Frequency                             | Method of activity measurement | Compliance | Mean change in activity                                                                                              |
|-----------------------------------|--------------------------|--------------|--------------------------------------------------------|------------------------------------------|--------------------|----------------------------------------------------|--------------------------------|------------|----------------------------------------------------------------------------------------------------------------------|
| Katsanos et al. 2004 [58]         | 237.5 ± 9 min            | RCD          | Physically active <sup>b</sup>                         | 25% VO <sub>2</sub> max                  | Treadmill walking  | 237.5 ± 9 min single bout                          | Expired gas measurement        | 100%       | Pre-Intervention: No data<br>Post-Intervention: 237.5 ± 9.0 min single bout walking                                  |
| Kim et al. 2014 [54]              | 214.5 ± 28.0 min         | RCD          | Recreationally active <sup>b</sup>                     | 25% VO <sub>2</sub> max                  | Treadmill walking  | 214.5 ± 28.0 min divided into 9 intermittent bouts | Expired gas measurement        | 100%       | Sitting group (min/d): 476 ± 36 sitting; 6.8 ± 3 walking<br>LIPA group (min/d): 226 ± 55 sitting; 213.9 ± 34 walking |
| Aldred, Perry & Hardman 1994 [49] | 120 min                  | RCD          | Regular physical activity <sup>b</sup>                 | 30.9% ± 1.6% VO <sub>2</sub> max         | Treadmill walking  | 120 min single bout                                | Expired gas measurement        | 100%       | No data                                                                                                              |
| Pay et al. 1992 [50]              | 120 min                  | Case Series  | Endurance-trained (regular structured program running) | 30% VO <sub>2</sub> max (29.8 ± 3.9%)    | Treadmill walking  | 120 min single bout                                | Expired gas measurement        | 100%       | No data                                                                                                              |
| Horowitz et al. 1999 [44]         | 120 min                  | RCD          | Moderately trained <sup>b</sup>                        | 25% VO <sub>2</sub> peak                 | Stationary cycling | 120 min single bout                                | Expired gas measurement        | 100%       | No data                                                                                                              |

Table 2 (continued)

| Study                         | Duration of Intervention | Study Design | Baseline Activity Level <sup>a</sup>                                                         | Activity Level Intensity (used criteria)     | Modality                                    | Duration and Frequency      | Method of activity measurement | Compliance | Mean change in activity                                                             |
|-------------------------------|--------------------------|--------------|----------------------------------------------------------------------------------------------|----------------------------------------------|---------------------------------------------|-----------------------------|--------------------------------|------------|-------------------------------------------------------------------------------------|
| Mestek et al. 2008 [36]       | 102.8 ± 4.3 min          | RCD          | Physically inactive (< 150 min of moderate intensity physical activity/wk for at least 3 mo) | 35-45% VO <sub>2</sub> max (38.6 ± 2.2)      | Treadmill walking                           | 102.8 ± 4.3 min single bout | Expired gas measurement        | 100%       | Pre-Intervention: No data<br>Post-Intervention: 102.8 ± 4.3 min single bout walking |
| Tsetsonis & Hardman 1996 [47] | 90 min                   | RCD          | Recreationally active but not well-trained <sup>b</sup>                                      | 30% VO <sub>2</sub> max                      | Treadmill walking                           | 90 min single bout          | Expired gas measurement        | 100%       | No data                                                                             |
| Tsetsonis & Hardman 1995 [46] | 90 min                   | RCD          | Recreationally active not trained <sup>b</sup>                                               | 30% VO <sub>2</sub> max                      | Treadmill walking                           | 90 min single bout          | Expired gas measurement        | 100%       | No data                                                                             |
| Dudgeon et al. 2010 [43]      | 60 min                   | RCT          | Exercise-naïve (no involvement in a structured exercise program)                             | 50% HR max                                   | Treadmill walking and/or stationary cycling | 60 min single bout          | Ergometer                      | 100%       | No data                                                                             |
| Hughes et al. 1990 [51]       | 45 min                   | URCT         | Novice runners (running <5miles/wk)                                                          | 20% below VT (=30% VO <sub>2</sub> R or HRR) | Treadmill walking                           | 45 min single bout          | Expired gas measurement        | 100%       | No data                                                                             |
| Mendham et al. 2011 [37]      | 40 min                   | RCD          | Sedentary (not involved in >1 regular exercise session/wk for >20min)                        | 30% VO <sub>2</sub> max                      | Stationary cycling                          | 40 min single bout          | HR monitor                     | 100%       | No data                                                                             |

Table 2 (continued)

| Study                     | Duration of Intervention | Study Design | Baseline Activity Level <sup>a</sup>                                                         | Activity Level Intensity (used criteria)  | Modality           | Duration and Frequency                                      | Method of activity measurement | Compliance | Mean change in activity |
|---------------------------|--------------------------|--------------|----------------------------------------------------------------------------------------------|-------------------------------------------|--------------------|-------------------------------------------------------------|--------------------------------|------------|-------------------------|
| Fujimoto et al. 2003 [45] | 35 min                   | RCD          | Endurance trained (regular participation in endurance training /competitive sports)          | 30% VO <sub>2</sub> max                   | Stationary cycling | 35 min single bout                                          | Ergometer                      | 100%       | No data                 |
| Bailey & Locke 2014 [40]  | 28 min                   | RCD          | No data                                                                                      | 2.9 METs (treadmill walking at 3.2 km/hr) | Treadmill walking  | 2-min bout every 20 min (28 min) over 5 hr treatment period | Borg RPE scale                 | 100%       | No data                 |
| Dunstan et al. 2012 [38]  | 28 min                   | RCD          | Physically inactive (< 150 min of moderate intensity physical activity/wk for at least 3 mo) | 2.9 METs (treadmill walking at 3.2 km/hr) | Treadmill walking  | 2-min bout every 20 min (28 min) over 5 hr treatment period | Activity monitor               | 100%       | No data                 |
| Larsen et al. 2014 [39]   | 28 min                   | RCD          | Physically inactive (< 150 min of moderate intensity physical activity/wk for at least 3 mo) | 2.9 METs (treadmill walking at 3.2 km/hr) | Treadmill walking  | 2-min bout every 20 min (28 min) over 5 hr treatment period | Activity monitor               | 100%       | No data                 |
| Wittert et al. 1991 [52]  | 15 min                   | RCD          | Athletes <sup>b</sup>                                                                        | 20% VO <sub>2</sub> max                   | Treadmill walking  | 15 min single bout                                          | No data                        | 100%       | No data                 |
| Perini et al. 1989 [48]   | 5 min                    | RCD          | Sedentary (sedentary not defined)                                                            | 15-33% VO <sub>2</sub> max (21.5% ± 2.8%) | Stationary cycling | 5 min single bout                                           | Ergometer                      | 100%       | No data                 |

Abbreviations: d, day; ECG, electrocardiogram; HR, heart rate; hr, hour; HRR, heart rate reserve; max, maximum; METs, metabolic equivalents; min, minute; mo, month; NRCT, non-randomized controlled trial; RCD, randomized cross-over design; RCT, randomized controlled trial; URCT, uncontrolled randomized clinical trial; VO<sub>2</sub> max, maximal oxygen consumption; VO<sub>2</sub> peak, peak rate of oxygen consumption; VO<sub>2</sub>R, oxygen consumption reserve; VT, ventilatory threshold; wk, week. <sup>a</sup>Described using the terminology of the primary study. <sup>b</sup>Level of activity not clearly described in the study. Compliance refers to the number of activity sessions completed by the participants (expressed in %).
